# Supplementary material for: Bronchodilator Delivery via High-Flow Nasal Cannula: A Randomized Controlled Trial to Compare the Effects of Gas Flows
Source: MDPI journal article supplement (doi:10.3390/pharmaceutics13101655), 2021-10-11
Supplement: s1 [file s1]

# Supplementary Materials: Bronchodilator Delivery via High-Flow Nasal Cannula: A Randomized Controlled Trial to Compare the Effects of Gas Flows

Jie Li, Yibing Chen, Stephan Ehrmann, Jie Wu, Lixin Xie and James B Fink

**Table S1.** Bronchodilation responses after inhaling salbutamol via HFNC among three groups for asthma and COPD patients.

|                                                                                                         |                                                                                                         |                 | GF: IF = 0.5 | GF: IF = 1.0 | GF = 50 L/min | <i>p</i> |
|---------------------------------------------------------------------------------------------------------|---------------------------------------------------------------------------------------------------------|-----------------|--------------|--------------|---------------|----------|
| Asthma                                                                                                  | No. of patients                                                                                         |                 | 16           | 16           | 17            |          |
|                                                                                                         | Met ATS/ERS positive criteria, %                                                                        | 0.5mg           | 7 (43.8%)    | 6 (37.5%)    | 7 (41.2%)     | 0.937    |
|                                                                                                         |                                                                                                         | 1.5mg           | 10 (62.5%)   | 9 (56.3%)    | 9 (52.9%)     | 0.854    |
|                                                                                                         |                                                                                                         | 3.5mg           | 11 (68.8%)   | 11 (68.8%)   | 12 (70.6%)    | 0.991    |
|                                                                                                         | Post-bronchodilator FEV <sub>1</sub> via HFNC returns to Screening post-bronchodilator FEV <sub>1</sub> | 0.5mg           | 1 (6.3%)     | 1 (6.3%)     | 2 (11.8%)     | 0.798    |
|                                                                                                         |                                                                                                         | 1.5mg           | 9 (56.3%)    | 3 (18.8%)    | 4 (23.5%)     | 0.047    |
|                                                                                                         |                                                                                                         | 3.5mg           | 15 (93.8%)   | 6 (37.5%)    | 8 (47.1%)     | 0.002    |
|                                                                                                         | COPD                                                                                                    | No. of patients |              | 9            | 8             | 9        |
| Met ATS/ERS positive criteria, %                                                                        |                                                                                                         | 0.5mg           | 4 (44.4%)    | 0            | 0             | 0.012    |
|                                                                                                         |                                                                                                         | 1.5mg           | 6 (66.7%)    | 5 (62.5%)    | 2 (22.2%)     | 0.118    |
|                                                                                                         |                                                                                                         | 3.5mg           | 6 (66.7%)    | 7 (87.5%)    | 6 (66.7%)     | 0.848    |
| Post-bronchodilator FEV <sub>1</sub> via HFNC returns to screening post-bronchodilator FEV <sub>1</sub> |                                                                                                         | 0.5mg           | 3 (33.3%)    | 2 (25%)      | 2 (22.2%)     | 0.859    |
|                                                                                                         |                                                                                                         | 1.5mg           | 7 (77.8%)    | 4 (50%)      | 3 (33.3%)     | 0.162    |
|                                                                                                         |                                                                                                         | 3.5mg           | 7 (77.8%)    | 5 (62.5%)    | 6 (66.7%)     | 0.776    |

GF, gas flow; IF, patient inspiratory flow; HFNC, high-flow nasal cannula; FEV<sub>1</sub>, forced expiratory volume at the first second; Screening, 400 mcg salbutamol via metered dose and valved holding chamber; ATS/ERS positive criteria: FEV<sub>1</sub> increased by 12% and absolute volume increased  $\geq 200$  mL; COPD, chronic obstructive pulmonary disease.

**Table S2.** The comparisons of FEV<sub>1</sub> changes after inhaling saline and salbutamol via HFNC at different accumulative doses in three groups.

|                 |                               |               | GF:IF = 0.5     | GF:IF = 1.0     | GF = 50L/min    | <i>p</i> |
|-----------------|-------------------------------|---------------|-----------------|-----------------|-----------------|----------|
| No. of patients |                               |               | 16              | 16              | 17              |          |
| Asthma          | Screening with Salbutamol     | Pre           | 1.97 $\pm$ 0.76 | 2.18 $\pm$ .86  | 2.24 $\pm$ .70  |          |
|                 |                               | Post          | 2.38 $\pm$ 0.78 | 2.58 $\pm$ .91  | 2.68 $\pm$ .74  |          |
|                 |                               | Increase (ml) | 411 $\pm$ 135   | 406 $\pm$ 109   | 443 $\pm$ 129   |          |
|                 |                               | Increase (%)  | 24.1 $\pm$ 12.1 | 21.5 $\pm$ 10.6 | 21.7 $\pm$ 10.0 |          |
|                 | FEV <sub>1</sub> (L) via HFNC | Pre           | 2.04 $\pm$ 0.84 | 2.08 $\pm$ .85  | 2.15 $\pm$ .78  | 0.923    |
|                 |                               | NS            | 2.07 $\pm$ 0.87 | 2.07 $\pm$ .83  | 2.11 $\pm$ .79  | 0.317    |
|                 |                               | 0.5mg         | 2.28 $\pm$ 0.86 | 2.31 $\pm$ .83  | 2.33 $\pm$ .76  | 0.572    |
|                 |                               | 1.5mg         | 2.38 $\pm$ 0.84 | 2.42 $\pm$ .83  | 2.51 $\pm$ .74  | 0.940    |

|      |                                                 |                    |             |             |             |       |
|------|-------------------------------------------------|--------------------|-------------|-------------|-------------|-------|
| COPD | FEV <sub>1</sub> increase (ml)                  | 3.5mg              | 2.45 ± 0.82 | 2.50 ± .81  | 2.62 ± .73  | 0.746 |
|      |                                                 | 7.5mg <sup>a</sup> | 2.60 ± 0.92 | 2.55 ± .89  | 2.73 ± .78  | 0.415 |
|      |                                                 | NS                 | 34 ± 79     | -4 ± 68     | -41 ± 162   | 0.180 |
|      |                                                 | 0.5mg              | 238 ± 157   | 236 ± 165   | 181 ± 170   | 0.572 |
|      |                                                 | 1.5mg              | 343 ± 170   | 349 ± 208   | 361 ± 254   | 0.940 |
|      | FEV <sub>1</sub> increase (%)                   | 3.5mg              | 413 ± 170   | 424 ± 245   | 464 ± 292   | 0.746 |
|      |                                                 | 0.5mg              | 14.6 ± 14.9 | 13.6 ± 10.4 | 9.9 ± 10.7  | 0.545 |
|      |                                                 | 1.5mg              | 21.4 ± 17.4 | 19.5 ± 13.0 | 19.9 ± 15.9 | 0.936 |
|      |                                                 | 3.5mg              | 26.1 ± 20.0 | 24.8 ± 17.0 | 25.5 ± 18.9 | 0.925 |
|      | No. of patients                                 |                    | 9           | 8           | 9           |       |
|      | FEV <sub>1</sub> (ml) Screening with Salbutamol | Pre                | 1.09 ± 0.47 | 1.58 ± 0.48 | 1.28 ± 0.58 |       |
|      |                                                 | Post               | 1.40 ± 0.48 | 1.87 ± 0.51 | 1.57 ± 0.60 |       |
|      |                                                 | Increase (mL)      | 310 ± 73    | 284 ± 52    | 288 ± 76    |       |
|      |                                                 | Increase (%)       | 32.9 ± 14.0 | 19.3 ± 6.5  | 27.0 ± 15.7 |       |
|      | FEV <sub>1</sub> (L) via HFNC                   | Pre                | 1.15 ± 0.47 | 1.58 ± 0.57 | 1.34 ± 0.53 | 0.278 |
|      |                                                 | NS                 | 1.15 ± 0.49 | 1.56 ± 0.55 | 1.28 ± 0.53 | 0.180 |
|      |                                                 | 0.5mg              | 1.36 ± 0.50 | 1.69 ± 0.56 | 1.44 ± 0.55 | 0.040 |
|      |                                                 | 1.5mg              | 1.43 ± 0.49 | 1.76 ± 0.58 | 1.48 ± 0.57 | 0.060 |
|      |                                                 | 3.5mg              | 1.45 ± 0.51 | 1.84 ± 0.58 | 1.58 ± 0.58 | 0.505 |
|      |                                                 | 7.5mg <sup>b</sup> | 1.55 ± 0.48 | 1.75 ± 0.41 | 1.66 ± 0.65 | 0.885 |
|      | FEV <sub>1</sub> increase (ml) from Baseline    | NS                 | 2 ± 102     | -5 ± 65     | -57 ± 87    | 0.317 |
|      |                                                 | 0.5mg              | 210 ± 132   | 119 ± 52    | 97 ± 69     | 0.040 |
|      |                                                 | 1.5mg              | 282 ± 143   | 195 ± 97    | 138 ± 120   | 0.060 |
|      |                                                 | 3.5mg              | 301 ± 156   | 276 ± 81    | 242 ± 104   | 0.505 |
|      | FEV <sub>1</sub> increase (%) from Baseline     | 0.5mg              | 19.8 ± 12.4 | 9.0 ± 6.4   | 7.7 ± 6.8   | 0.042 |
|      |                                                 | 1.5mg              | 27.7 ± 16.6 | 14.1 ± 8.4  | 11.0 ± 9.4  | 0.036 |
|      |                                                 | 3.5mg              | 29.0 ± 15.5 | 20.0 ± 9.4  | 19.0 ± 7.9  | 0.287 |

GF, gas flow; IF, patient inspiratory flow; HFNC, high-flow nasal cannula; FEV<sub>1</sub>, forced expiratory volume at the first second; Screening, 400 mcg salbutamol via metered dose inhaler and valved holding chamber; ATS/ERS positive criteria: FEV<sub>1</sub> increased by 12% and absolute volume increased ≥ 200mL; COPD, chronic obstructive pulmonary disease. <sup>a</sup>Data was available in 13,14, and 15 patients, respectively; <sup>b</sup> data was available in 8,7 and 8 patients, respectively.
